# Supplementary material
Source: publisher figshare collection journal article supplement (https://acs.figshare.com/ndownloader/files/4066609)
Supplement: Supplementary file 1 [file 4066609]

# Supporting Information for

## Superhydrophobic Hierarchically-Assembled Films of Diblock Copolymer

### Hollow Nanospheres and Nanotubes

Guping He,<sup>1</sup> Jiwen Hu,\*<sup>1</sup> Guojun Liu,\*<sup>1,2</sup> Yinhui Li,<sup>1</sup> Ganwei Zhang,<sup>1</sup> Feng Liu,<sup>1</sup> Jianpin Sun,<sup>1</sup>

Hailiang Zou,<sup>1</sup> Yuanyuan Tu, and Dingshu Xiao<sup>1</sup>

<sup>1</sup>: Guangzhou Institute of Chemistry, Chinese Academy of Sciences, Guangzhou, P. R. China, 510650.

<sup>2</sup>: Department of Chemistry, Queen's University, 90 Bader Lane, Kingston, Ontario, Canada K7L 3N6

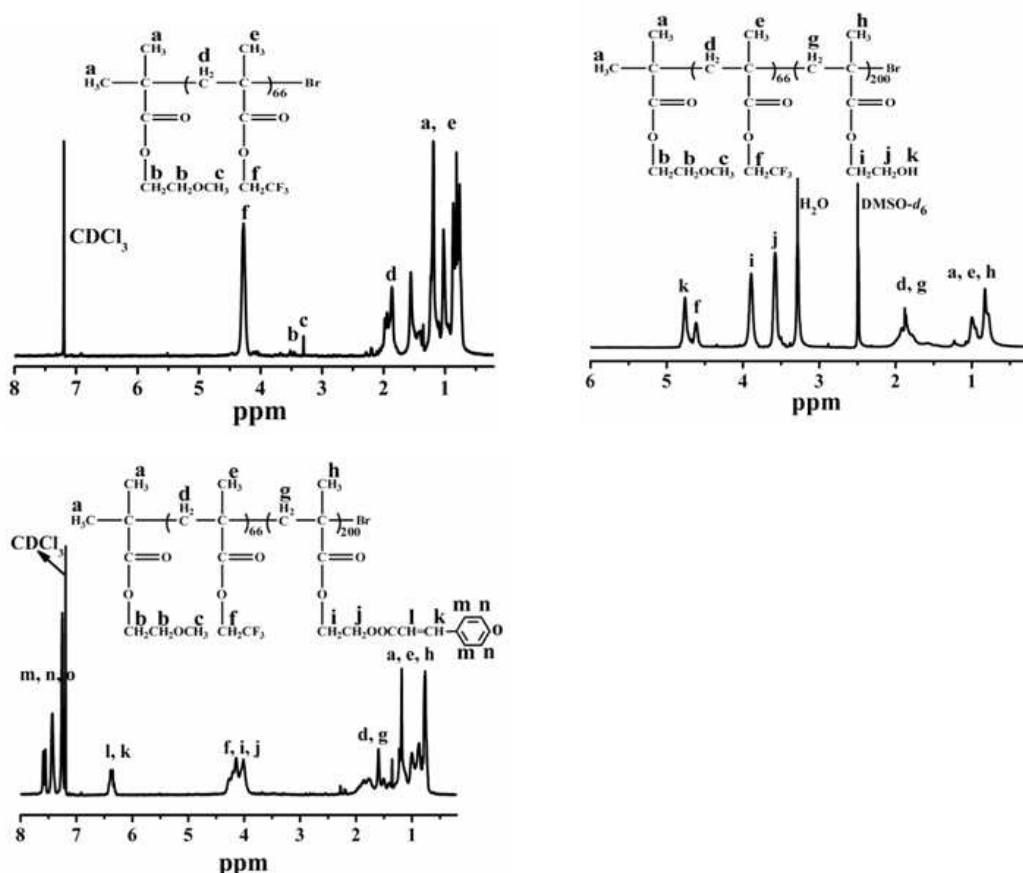

Figure S1. <sup>1</sup>H NMR spectra of  $F_{66}$ ,  $PFEMA_{66}$ - $b$ - $PHEMA_{200}$  and  $F_{66}M_{200}$ .

\* Corresponding author, Email: [hjw@gic.ac.cn](mailto:hjw@gic.ac.cn), Fax: 86-20-85232307

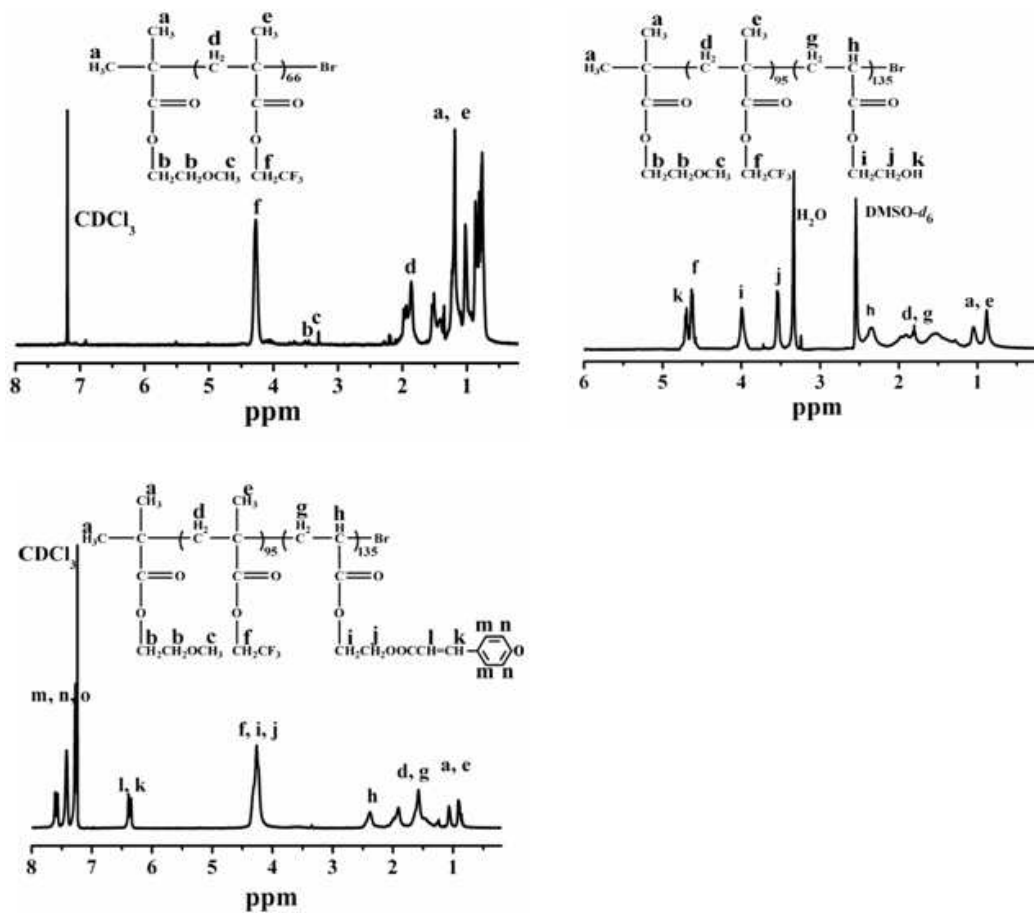

Figure S2.  $^1\text{H}$  NMR spectra of  $\text{F}_{95}$ ,  $\text{PFEMA}_{95}\text{-}b\text{-PHEA}_{135}$  and  $\text{F}_{95}\text{A}_{135}$ .

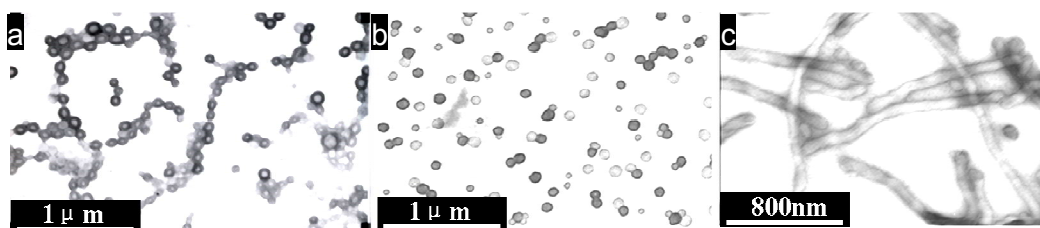

Figure S3. TEM images of vesicular  $F_{66}M_{200}$  aggregates (before (a) and after (b) crosslinking), and tubular  $F_{95}A_{135}$  micelles after (c) crosslinking. The samples for TEM observation were aero-sprayed from FEMA before stained with  $RuO_4$ .

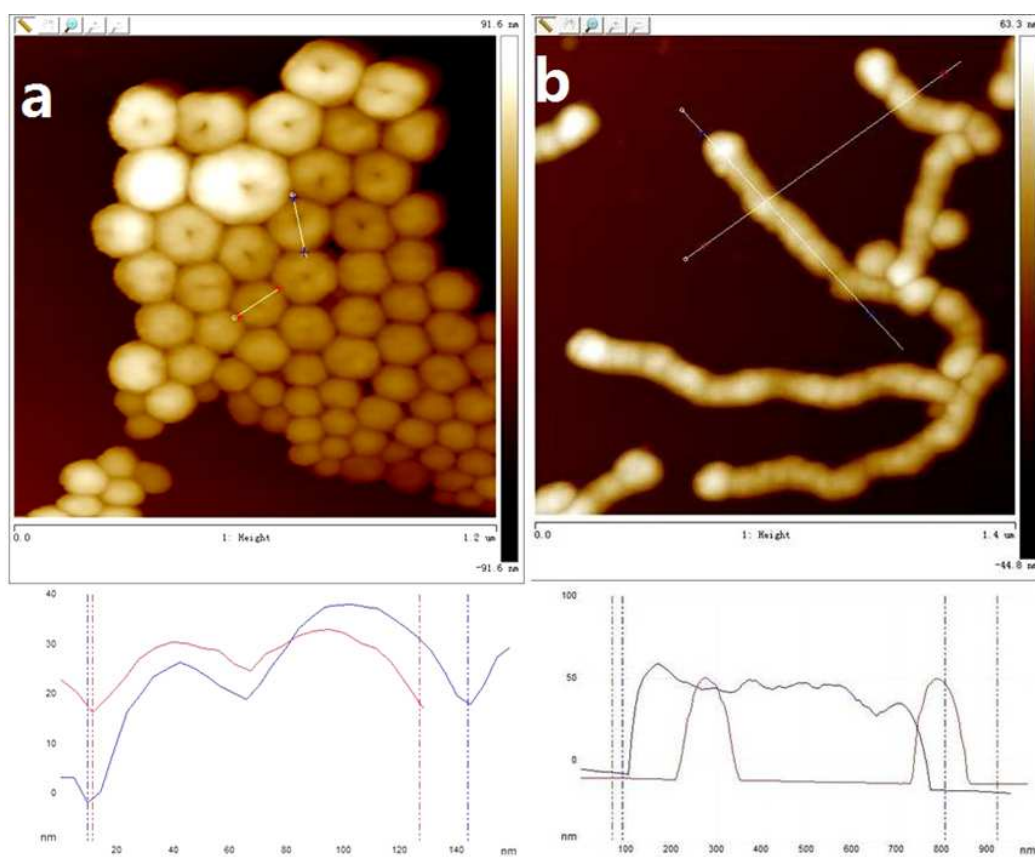

Figure S4. AFM height images with section analysis of vesicular  $F_{66}M_{200}$  aggregates (a) and tubular  $F_{95}A_{135}$  micelles (b).

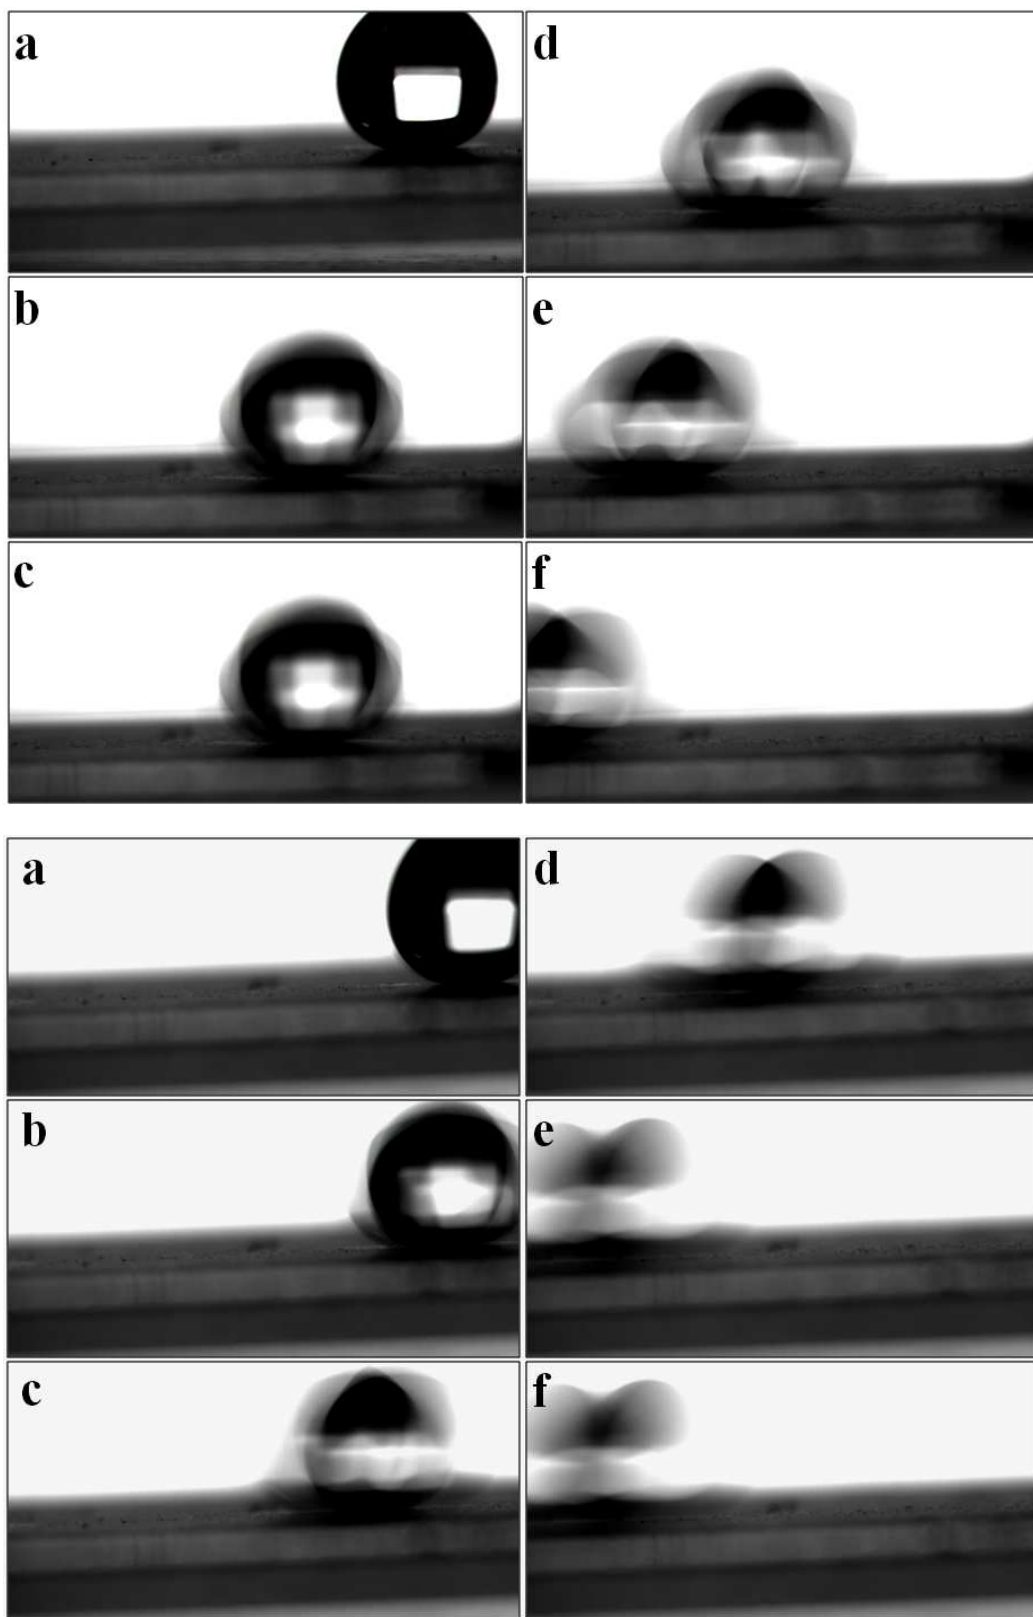

Figure S5. The images of the sliding of a water droplet of 8  $\mu\text{L}$  on the surface with slant angle of  $3^\circ$  (top), and  $5^\circ$  (bottom): (a) beginning; (b)–(f) the sliding process.
